# Supplementary material for: Surveillance of classical swine fever in wild boar in South Korea from 2010–2014
Source: PubMed Central journal article supplement — J Vet Med Sci. 2015 Jul 16;77(12):1667–71. doi: 10.1292/jvms.14-0519 (PMC4710727; doi:10.1292/jvms.14-0519), 2015-07-16
Supplement: jvms-77-1667-s001.pdf [file jvms-77-1667-s001.pdf]

**Supplemental Table 1.** Seroprevalence of classical swine fever virus in the wild boar population in South Korea

| Province    | Positive samples/total no. of animals captured in each individual year (%) |          |          |         |         |                    |
|-------------|----------------------------------------------------------------------------|----------|----------|---------|---------|--------------------|
|             | 2010                                                                       | 2011     | 2012     | 2013    | 2014    | Years<br>2010–2014 |
| Gyeonggi    | 2/65                                                                       | 4/238    | 2/214    | 0/301   | 2/264   | 10/1,082 (0.92)    |
| Gangwon     | 0/32                                                                       | 2/220    | 2/262    | 0/426   | 1/208   | 5/1,148 (0.44)     |
| Chungbuk    | 0/33                                                                       | 1/94     | 0/151    | 0/178   | 0/112   | 1/568 (0.18)       |
| Chungnam    | 0/7                                                                        | 2/111    | 1/125    | 0/228   | 0/228   | 3/699 (0.43)       |
| Jeonbuk     | 0/2                                                                        | 0/12     | 0/47     | 0/31    | 0/52    | 0/144(0)           |
| Jeonnam     | 2/22                                                                       | 0/88     | 2/157    | 0/109   | 0/104   | 4/480 (0.83)       |
| Gyeongbuk   | 0/27                                                                       | 0/156    | 3/352    | 2/305   | 1/426   | 6/1,266 (0.47)     |
| Gyeongnam   | 1/9                                                                        | 3/238    | 5/341    | 0/273   | 1/380   | 10/1,241 (0.81)    |
| Jeju Island | 0/0                                                                        | 0/2      | 0/3      | 0/1     | 0/20    | 0/26 (0)           |
| Total       | 5/197                                                                      | 12/1,159 | 15/1,652 | 2/1,852 | 5/1,794 | 39/6,654 (0.59)    |
| (%)         | (2.54)                                                                     | (1.04)   | (0.91)   | (0.11)  | (0.28)  |                    |

No., number.
